# Supplementary material for: Steric effect involved in Ln3+/Ce3+exchange in a coordination polymer based on di(2-ethylhexyl)phosphoric acid
Source: Royal Society of Chemistry journal article supplement (doi:10.1039/c3dt52451e), 2013-10-15
Supplement: c3dt52451e.pdf [file c3dt52451e.pdf]

Electric Supporting Information for

**Steric effect involved in  $\text{Ln}^{3+}/\text{Ce}^{3+}$  exchange in a coordination polymer based on di(2-ethylhexyl) phosphoric acid**

Yuiko Tasaki-Handa,\* Yukie Abe, Kenta Ooi, Mikiya Tanaka, and Akihiro Wakisaka

*Research Institute for Environmental Management Technology, National Institute of Advanced Industrial Science and Technology (AIST)  
Onogawa 16-1, Tsukuba, Ibaraki, Japan. Fax: +81-29-861-8252; Tel: +81-29-861-8772; E-mail: yuiko-tasaki@aist.go.jp*

Figure S1 shows SEM images of  $[\text{Nd}(\text{dehp})_3]$  (a),  $[\text{Gd}(\text{dehp})_3]$  (b),  $[\text{Dy}(\text{dehp})_3]$  (c), and  $[\text{Lu}(\text{dehp})_3]$  (d) that were prepared by mixing  $\text{LnCl}_3$  ( $\text{Ln}=\text{Nd}$ ,  $\text{Gd}$ ,  $\text{Dy}$ , or  $\text{Lu}$ ) and di(2-ethylhexyl)phosphoric acid (Hdehp) in an 80:20 (vol%) ethanol/water binary mixture. They are aggregates of rod-like crystals. The size of crystals becomes smaller in the order  $[\text{Nd}(\text{dehp})_3] > [\text{Gd}(\text{dehp})_3] > [\text{Dy}(\text{dehp})_3] > [\text{Lu}(\text{dehp})_3]$ .

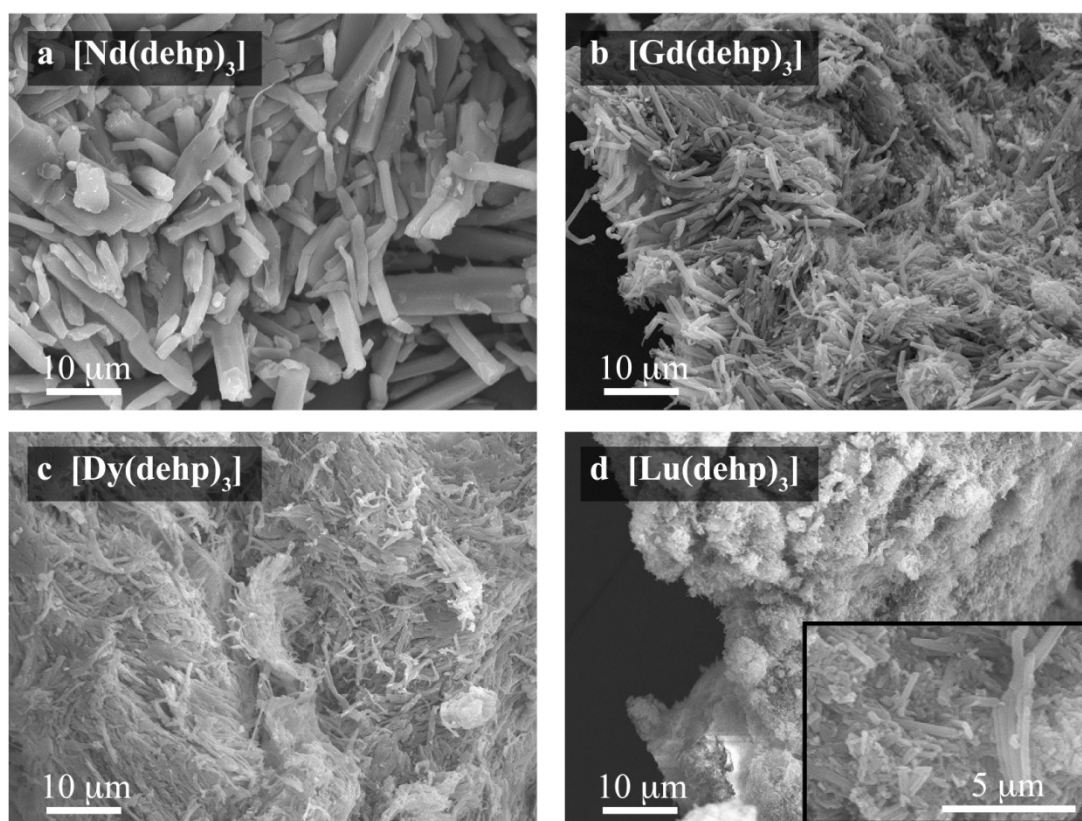

Figure S1 SEM images of  $[\text{Nd}(\text{dehp})_3]$  (a),  $[\text{Gd}(\text{dehp})_3]$  (b),  $[\text{Dy}(\text{dehp})_3]$  (c), and  $[\text{Lu}(\text{dehp})_3]$  (d) at a magnification of 1500.
